# Supplementary material for: Dendritic Y4O(OH)9NO3:Eu3+/Y2O3:Eu3+ hierarchical structures: controlled synthesis, growth mechanism, and luminescence properties
Source: Royal Society of Chemistry journal article supplement (doi:10.1039/c3ce40460a), 2013-01-01
Supplement: c3ce40460a.pdf [file c3ce40460a.pdf]

**Electronic Supplementary Information (ESI)**

**Dendritic  $\text{Y}_4\text{O}(\text{OH})_9\text{NO}_3:\text{Eu}^{3+}/\text{Y}_2\text{O}_3:\text{Eu}^{3+}$  hierarchical structures: controlled synthesis, growth mechanism, and luminescence properties**

Qi Zhao,<sup>ab</sup> Hongpeng You,<sup>\*b</sup> Wei Lü,<sup>b</sup> Ning Guo,<sup>ab</sup> Yongchao Jia,<sup>ab</sup> Wenzhen Lv,<sup>ab</sup> Baiqi Shao,<sup>ab</sup> and Mengmeng Jiao<sup>ab</sup>

<sup>a</sup> University of the Chinese Academy of Sciences, Beijing 100049, P. R. China.S

<sup>b</sup> State key Laboratory of Rare Earth Resource Utilization, Changchun Institute of Applied Chemistry, Chinese Academy of Sciences, Changchun 130022, P. R. China.

\*Corresponding author: E-mail address: [hpyou@ciac.jl.cn](mailto:hpyou@ciac.jl.cn)

**Table S1**

|                                                     | S1  | S2  | S3   | S4   | S5   | S6   | S7   | S8   |
|-----------------------------------------------------|-----|-----|------|------|------|------|------|------|
| <b>Y(NO<sub>3</sub>)<sub>3</sub> (1M) (mL)</b>      | 1.9 | 1.9 | 1.9  | 1.9  | 1.9  | 1.9  | 1.9  | 1.9  |
| <b>Eu(NO<sub>3</sub>)<sub>3</sub> (0.05 M) (mL)</b> | 2   | 2   | 2    | 2    | 2    | 2    | 2    | 2    |
| <b>Deionized water (mL)</b>                         | 1.1 | 6.1 | 11.1 | 16.1 | 21.1 | 26.1 | 28.1 | 31.1 |
| <b>Total water (mL)</b>                             | 5   | 10  | 15   | 20   | 25   | 30   | 32   | 35   |
| <b>EG (mL)</b>                                      | 30  | 25  | 20   | 15   | 10   | 5    | 3    | 0    |

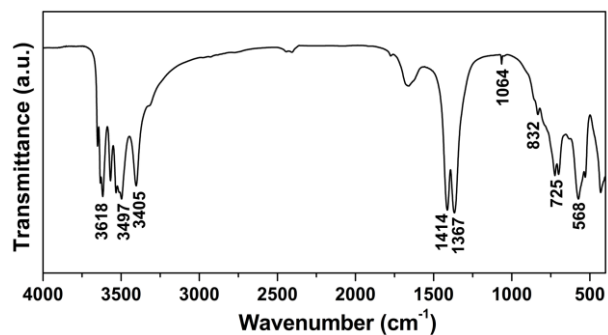

**Fig. S1** FT-IR spectrum of as-obtained Y<sub>4</sub>O(OH)<sub>9</sub>NO<sub>3</sub> (S5).

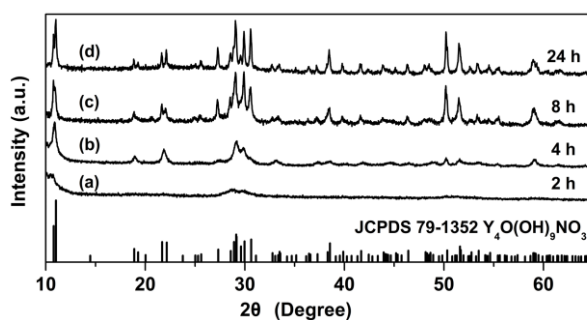

**Fig. S2** XRD patterns of sample S5 after the reaction proceeded (a) 2 h, (b) 4 h, (c) 8 h, and (d) 24 h.

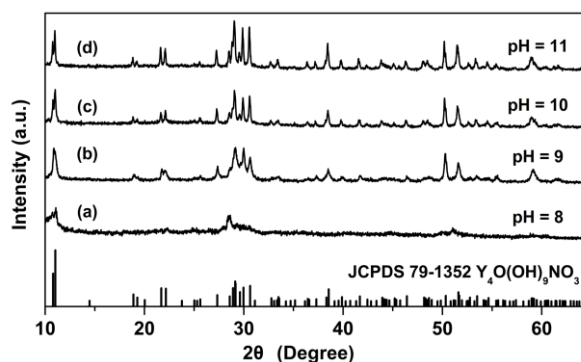

**Fig. S3** XRD patterns of Y<sub>4</sub>O(OH)<sub>9</sub>NO<sub>3</sub> prepared at different pH values.

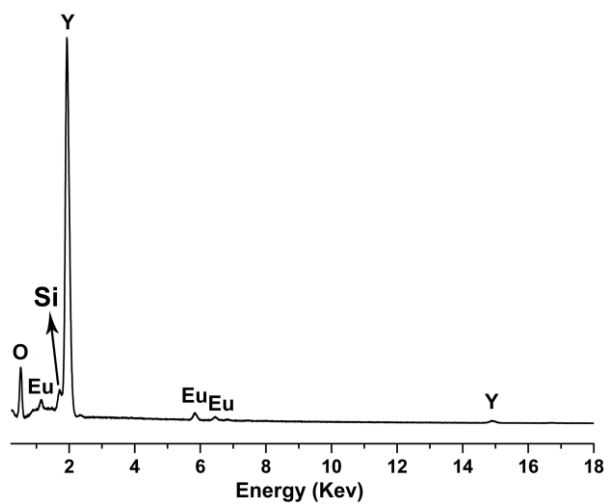

Fig. S4 The typical EDS spectrum of the  $\text{Y}_2\text{O}_3:\text{Eu}^{3+}$  (C5).
